# Supplementary material
Source: Springer Nature journal article supplement (https://www.springermedizin.de/resource/supplementary/12906_2011_526_MOESM6_ESM.pdf/9519942)
Supplement: MOESM6 [file 9519942]

## Before spraying

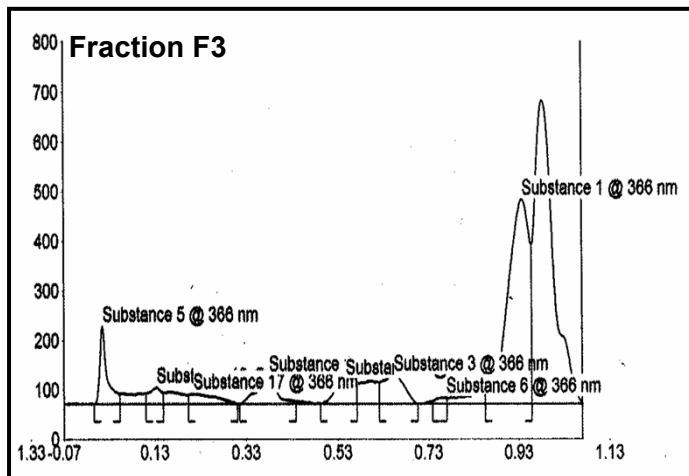

| Rf Value | Assigned Substance | Area % |
|----------|--------------------|--------|
| 0.00     | Substance 5        | 02.66  |
| 0.03     | Substance 8        | 01.11  |
| 0.06     | Substance 10       | 00.72  |
| 0.14     | Substance 12       | 00.85  |
| 0.23     | Substance 11       | 02.01  |
| 0.37     | Substance 7        | 01.40  |
| 0.54     | Substance 4        | 05.16  |
| 0.62     | Substance 3        | 13.58  |
| 0.71     | Substance 6        | 01.29  |
| 0.87     | Substance 1        | 48.53  |
| 0.91     | Substance 2        | 22.69  |

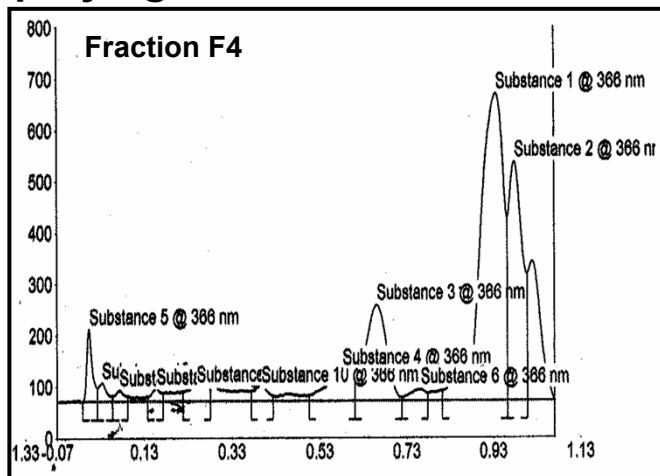

| Rf Value | Assigned Substance | Area % |
|----------|--------------------|--------|
| 0.01     | Substance 5        | 07.96  |
| 0.12     | Substance 9        | 02.91  |
| 0.20     | Substance 13       | 03.95  |
| 0.35     | Substance 7        | 07.43  |
| 0.51     | Substance 4        | 06.69  |
| 0.61     | Substance 3        | 08.79  |
| 0.72     | Substance 6        | 00.96  |
| 0.88     | Substance 1        | 61.31  |

## After spraying anisaldehyde sulphuric acid reagent

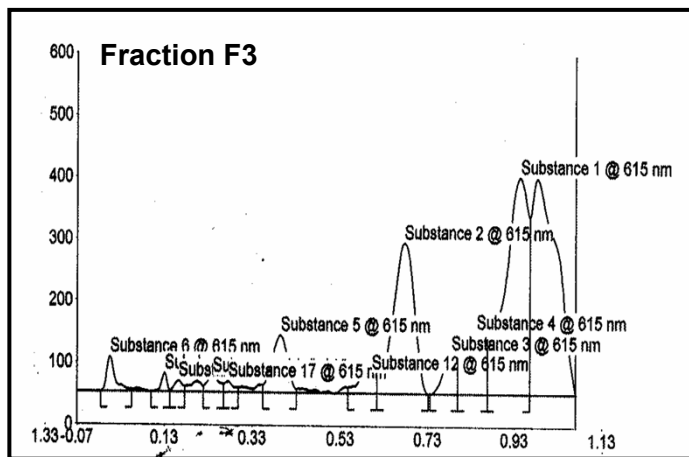

| Rf Value | Assigned Substance | Area % |
|----------|--------------------|--------|
| 0.00     | Substance 6        | 02.44  |
| 0.12     | Substance 8        | 00.83  |
| 0.15     | Substance 9        | 00.75  |
| 0.22     | Substance 12       | 01.63  |
| 0.25     | Substance 13       | 00.83  |
| 0.36     | Substance 5        | 07.22  |
| 0.56     | Substance 10       | 02.86  |
| 0.63     | Substance 2        | 26.16  |
| 0.73     | Substance 3        | 04.37  |
| 0.79     | Substance 4        | 11.13  |
| 0.88     | Substance 1        | 41.78  |

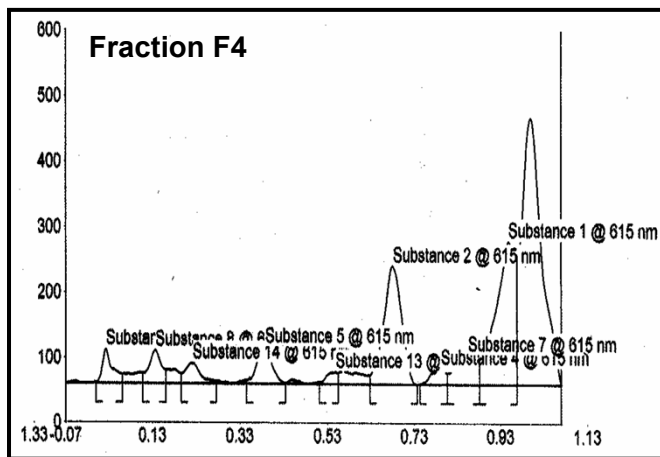

| Rf Value | Assigned Substance | Area % |
|----------|--------------------|--------|
| 0.02     | Substance 6        | 04.56  |
| 0.12     | Substance 8        | 05.39  |
| 0.20     | Substance 12       | 04.21  |
| 0.36     | Substance 5        | 07.16  |
| 0.51     | Substance 11       | 01.80  |
| 0.63     | Substance 2        | 27.84  |
| 0.74     | Substance 4        | 03.02  |
| 0.81     | Substance 7        | 08.68  |
| 0.89     | Substance 1        | 37.33  |
